# Supplementary material for: A Metabolic Enhancer Protects against Diet-Induced Obesity and Liver Steatosis and Corrects a Pro-Atherogenic Serum Profile in Mice
Source: MDPI journal article supplement (doi:10.3390/nu15102410), 2023-05-22
Supplement: s1 [file s1]

# A metabolic enhancer protects against diet-induced obesity, liver steatosis and corrects a pro-atherogenic serum profile in mice

Khrystyna Platk<sup>1,†</sup>, Paul F. Lebeau<sup>1,†</sup>, Joshua P. Nederveen<sup>2,†</sup>, Jae Hyun Byun<sup>1</sup>, Melissa E. MacDonald<sup>1</sup>, Jacqueline M. Bourgeois<sup>3</sup>, Mark A. Tarnopolsky<sup>2,4,\*</sup> and Richard C. Austin<sup>1,\*</sup>

<sup>1</sup> Department of Medicine, Division of Nephrology, McMaster University, and The Research Institute of St. Joe's Hamilton, Hamilton, Ontario, Canada.

<sup>2</sup> Department of Pediatrics, Faculty of Health Sciences, McMaster University Medical Centre (MUMC), Hamilton, Ontario, Canada

<sup>3</sup> Department of Pathology and Molecular Medicine, Faculty of Health Sciences, McMaster University Medical Centre (MUMC), Hamilton, Ontario, Canada

<sup>4</sup> Exerkine Corporation, MUMC, Hamilton, Ontario, Canada

\* Correspondence: tarnopol@mcmaster.ca (M.A.T.); austinr@mcmaster.ca (R.C.A.); Tel.: +905-522-1155 x35175 (R.C.A.); Fax: 905-540-6589 (R.C.A.).

† These authors contributed equally to this work.

**Supporting Table S1: List of Antibodies**

| Antibody       | Manufacturer             | Product Number | Antibody Concentration | Application | Antibody Dilution   |
|----------------|--------------------------|----------------|------------------------|-------------|---------------------|
| $\beta$ -actin | Sigma-Aldrich            | A2228          | 2mg/mL                 | Immunoblot  | 1:5000              |
| cCasp-1        | Abcam                    | AB138483       | 1mg/mL                 | Immunoblot  | 1:500               |
| CD36           | Novus-Biologicals        | NB400-144      | 1mg/mL                 | IHC         | 1:100, no retrieval |
| CHOP           | Santa Cruz Biotechnology | SC-793         | 200ug/mL               | Immunoblot  | 1:500               |
| GRP78          | BD Biosciences           | 610979         | 250ug/mL               | Immunoblot  | 1:1000              |
|                |                          |                |                        | IF          | 1:1000              |
| GRP94          | Enzo Life Sciences       | ADI-SPA-850    | 200ug/mL               | Immunoblot  | 1:1000              |
|                |                          |                |                        | IF          | 1:100               |
| Fibronectin    | Abcam                    | Ab2413         | 200ug/mL               | IF          | 1:100               |
| LDLR           | R and D Systems          | AF2255         | 1mg/mL                 | IF          | 1:100               |
|                |                          |                |                        | IHC         | 1:100, HIER         |
| sXBP1          | Santa Cruz Biotechnology | SC-8015        | 200ug/mL               | Immunoblot  | 1:1000              |
| XBP1           | Santa Cruz Biotechnology | SC-8015        | 200ug/mL               | Immunoblot  | 1:1000              |

**Supporting Table S2: List of Primers Used for qRT-PCR**

| Gene          | Species | Forward                          | Reverse                            |
|---------------|---------|----------------------------------|------------------------------------|
| ADRP          | Mouse   | TCTCAGGGGTGGTGGATAA              | TCTACCAGCAGCTCCGACTT               |
| ATF4          | Mouse   | ATGGCCGGCTATGGATGAT              | CGAAGTCAAACCTTTTCAGATCCATT         |
| Casp1         | Mouse   | TCCGCGGTTGAATCCTTTTCAGA          | ACCACAATTGCTGTGTGTGCGCA            |
| Casp3         | Mouse   | CCTCAGAGAGACATTCATGG             | GCAGTAGTCGCCTCTGAAGA               |
| Casp7         | Mouse   | GGACCGAGTGCCCACTTATC             | TCGCTTTGTCTGAAGTTCTTGTT            |
| Casp9         | Mouse   | AGGAGGGACGAACACGTCT              | CAAAGAAGGTTGCCCAATCT               |
| CHOP          | Mouse   | CTGCCTTTCACCTTGGAGAC             | CGTTTCCTGGGGATGAGATA               |
| FN1           | Mouse   | CGAGGTGACAGAGACCACAA             | CTGGAGTCAAGCCAGACACA               |
| GRP78         | Mouse   | GTCCTGCATCATCAGCGAAAG            | GGTAGCCACATACTGAACACCA             |
| HNF1 $\alpha$ | Mouse   | CTTCCTTCTTCATGCCAG               | ACACGTCCCCATCTGAAG                 |
| IL1 $\beta$   | Mouse   | GCACTACAGGCTCCGAGATGAAC          | TTGTCGTTGCTTGGTTCTCCTTGT           |
| IRE1 $\alpha$ | Mouse   | TGAAACACCCCTTCTTCTGG             | CCTCCTTTTCTATTCCGGTCACTT           |
| PARP1         | Mouse   | GGAAAGGGATCTACTTTGCCG            | TCGGGTCTCCCTGAGATGTG               |
| PERK          | Mouse   | CCTTGGTTTTCATCTAGCCTCA           | ATCCAGGGAGGGGATGAT                 |
| PCSK9         | Mouse   | TGCAAAATCAAGGAGCATGGG            | CAGGGAGCACATTGCATCC                |
| SREBP1        | Mouse   | ACCCTGGTGAGTGGAGGGACCATCT<br>TGG | CTTTGCTTCAGTGCCCAACCACAGGT<br>CTTT |
| SREBP2        | Mouse   | GTGGAGCAGTCTCAACGTCA             | TGGTAGGTCTCACCCAGGAG               |
| sXBP1         | Mouse   | GAGTCCGCAGCAGGTG                 | GTGTCAGAGTCCATGGGA                 |
| TNF $\alpha$  | Mouse   | CATGAGCACAGAAAGCATGATCCG         | AAGCAGGAATGAGAAGAGGCTGAG           |
| TGF $\beta$   | Mouse   | CAACAATTCTGGCGTTACCTTGG          | GAAAGCCCTGTATTCCGTCTCCTT           |
| 18S           | Mouse   | GGACCAGAGCGAAAGCATTTGCC          | TCAATCTCGGGTGGCTGAACGC             |

**Supporting Table S3: Criteria Used to Determine Steatosis Grade**

| Steatosis Grade |           |                       |
|-----------------|-----------|-----------------------|
| 0               | none      | No affected cells     |
| 1               | mild      | Small clusters        |
| 2               | moderate  | Rare macroglubule     |
| 3               | extensive | Numerous macroglubule |

Supplemental Figures and Figure Legends

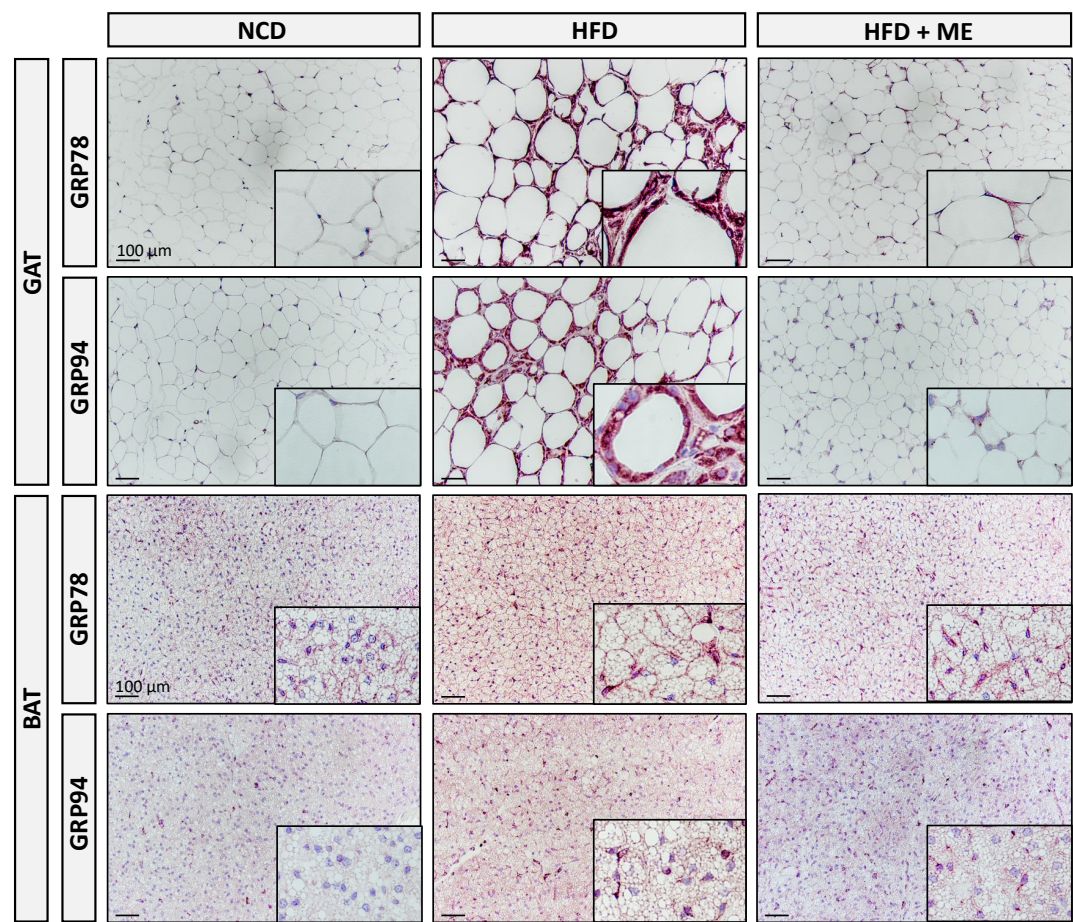

**Supplemental Figure S1: Metabolic enhancer attenuates UPR activation in adipose tissue.** Immunohistochemical staining of GRP78 and GRP94 in GAT and BAT. Scale bars, 100 μm.

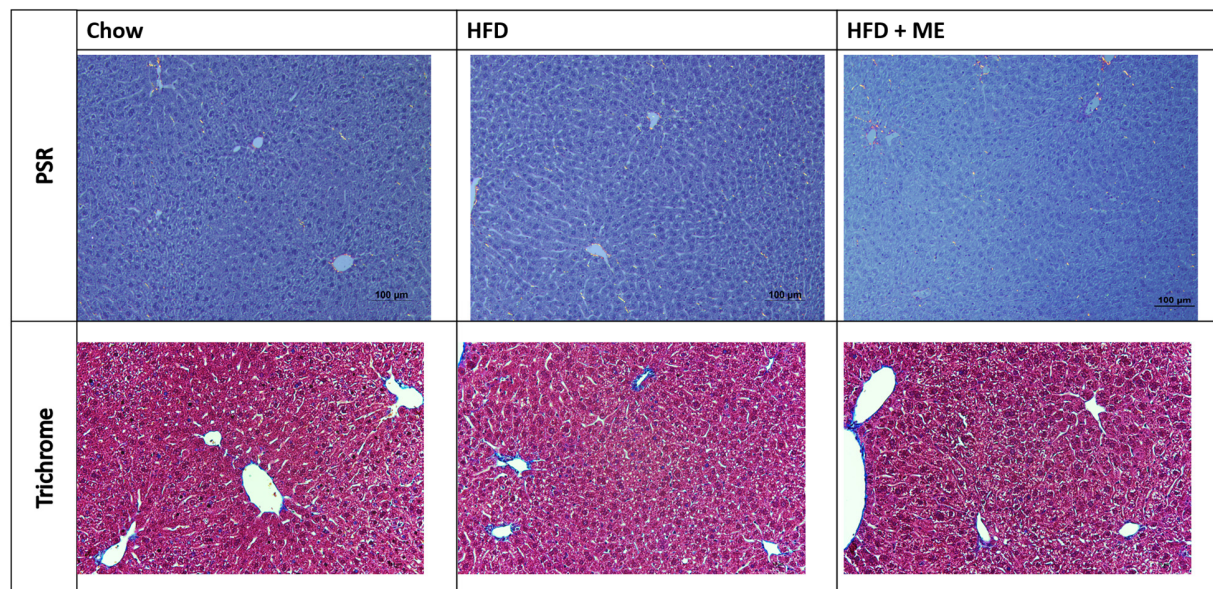

**Supplemental Figure S2: PSR and Trichrome.**

Mouse livers were stained to assess fibrosis using PSR and trichrome (n=6). These images are representative of a series of images taken from each mouse to allow for statistical comparisons, which were conducted with unpaired Students t-tests using Prism 6 (GraphPad).

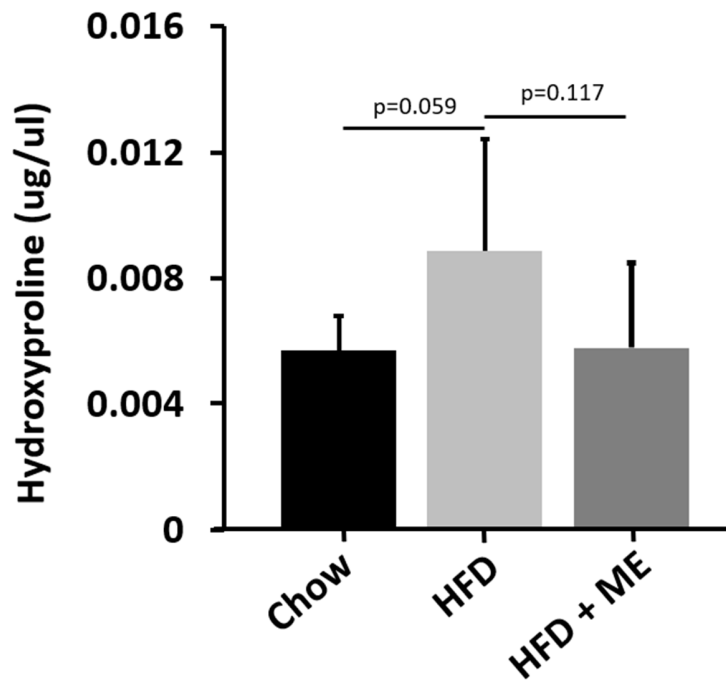

**Supplemental Figure S3: Hydroxyproline ELISA.**

Hydroxyproline ELISA in mouse serum (n=6). All data are shown as mean  $\pm$ SD. Statistical comparisons conducted with unpaired Students t-tests using Prism 6 (GraphPad).

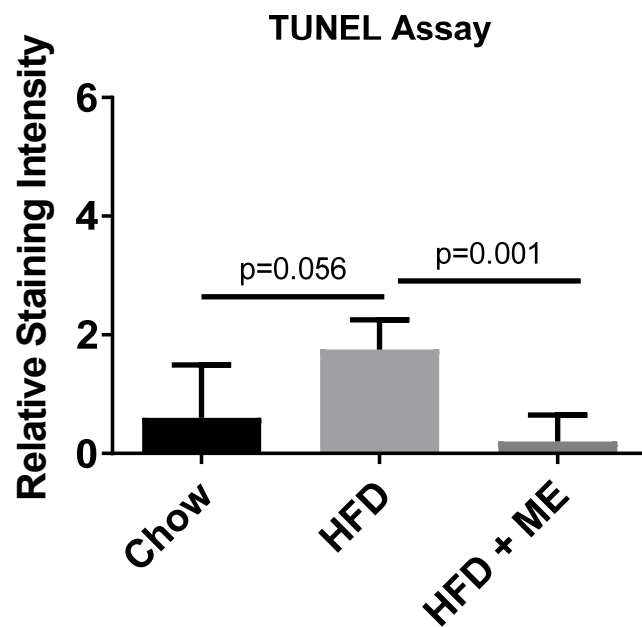

**Supplemental Figure S4: TUNEL assay quantification.**

Quantification of TUNEL assay in mouse liver (n=5). All data are shown as mean ±SD. Statistical comparisons conducted with unpaired Students t-tests using Prism 6 (GraphPad).

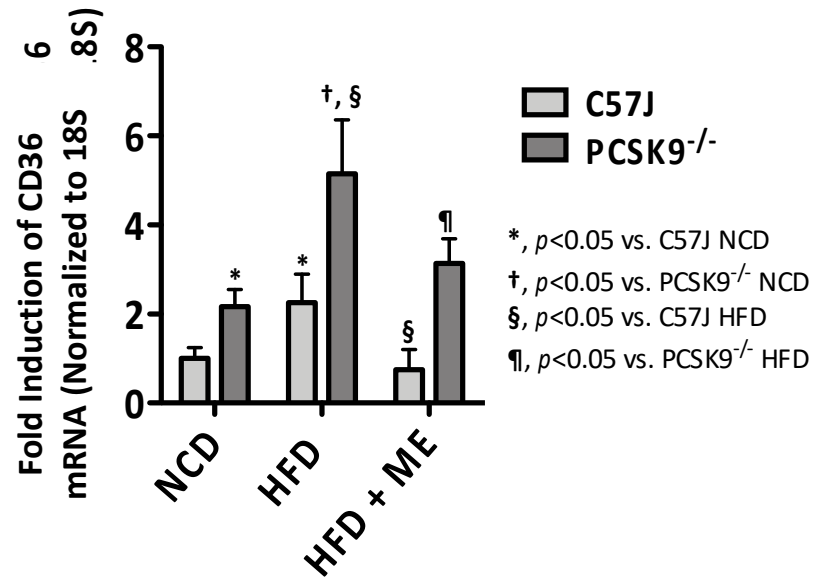

**Supplemental Figure S5: Metabolic enhancer attenuates CD36 Expression.**

Quantitative real time PCR analysis of mRNA hepatic abundance of CD36 (n=5-6). All data are shown as mean  $\pm$ SD. \*,  $p < 0.05$  by one-way ANOVA with Tukey multiple comparison testing using Prism 6 (GraphPad).
